# Supplementary material for: Analysis of genetic recombination and the pan-genome of a highly recombinogenic bacteriophage species
Source: PubMed Central journal article supplement (PMC6755498; doi:10.1099/mgen.0.000282), 2019-07-16
Supplement: mgen-5-282-s001.pdf [file mgen-5-282-s001.pdf]

# Analysis of genetic recombination and the pan-genome of a highly recombinogenic bacteriophage species

## Supplementary Material

### Parameters for pan-genome determination

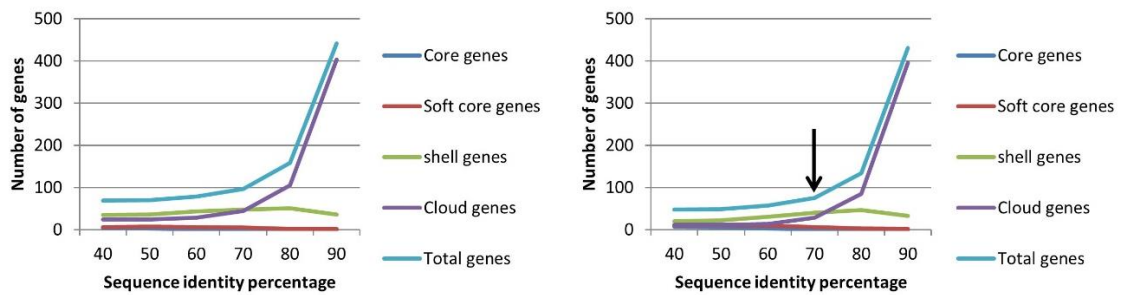

**Figure S1.** Summary of statistics output using Roary [1] for sequence identify percentage from 40 to 90 using intervals of 10. Left panel paralog enable and right panel paralog disable. The number of total genes exponentially increases for sequence identity percentages  $\geq 70$ . The arrow points for the parameters used to select the soft-core genome of *H. pylori* prophages (sequence identity percentage = 70; paralog disable).

## Visual examination of the genome alignment and a soft-core gene

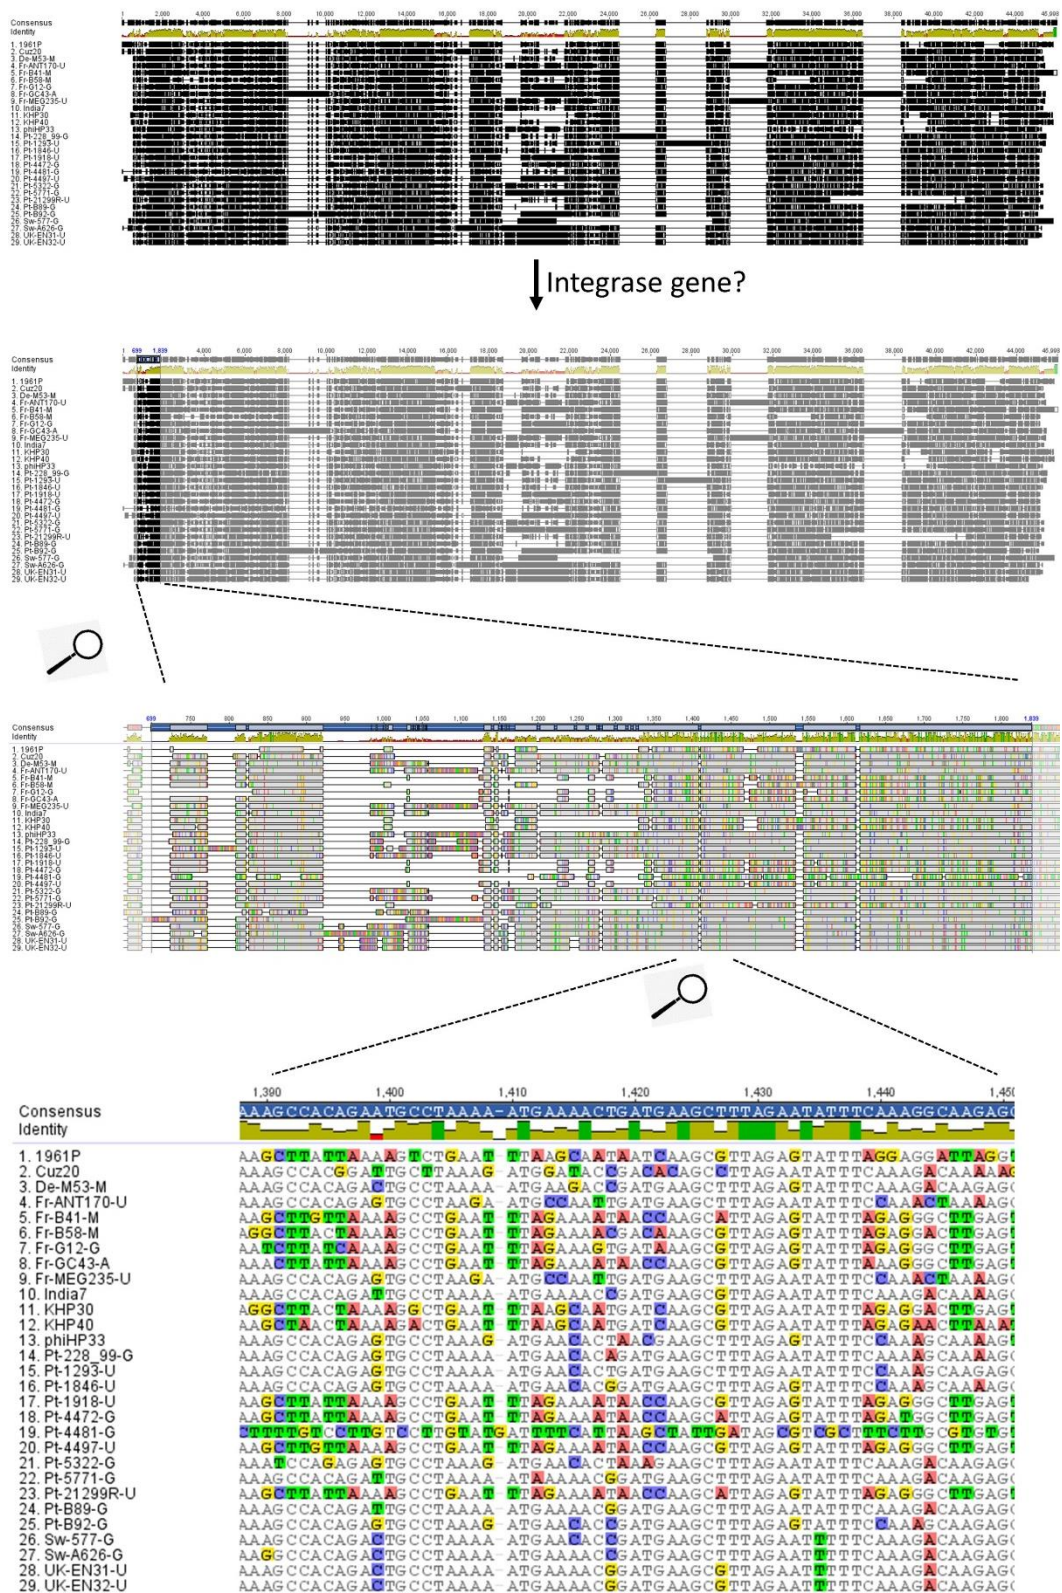

**Figure S2.** Successive close-ups identifying the position of the integrase gene in the phage multiple genome alignment (produced with MAFFT) in a synteny block. Top bar in the “Identity” track represents the color-coded consensus identity: green: 100% identity, greenish-brown: at

least 30% and under 100% identity, red: below 30% identity. The images were produced with Geneious 8.1.9. (a) Whole genome alignment. (b) Location of the integrase gene (black). (c) Zooming-in to the integrase gene. The black rectangles indicate regions with lower sequence similarity to the consensus than those illustrated by the light grey rectangles. (d) Zooming-in to the middle of the integrase gene.

### Genetic flux among phage populations

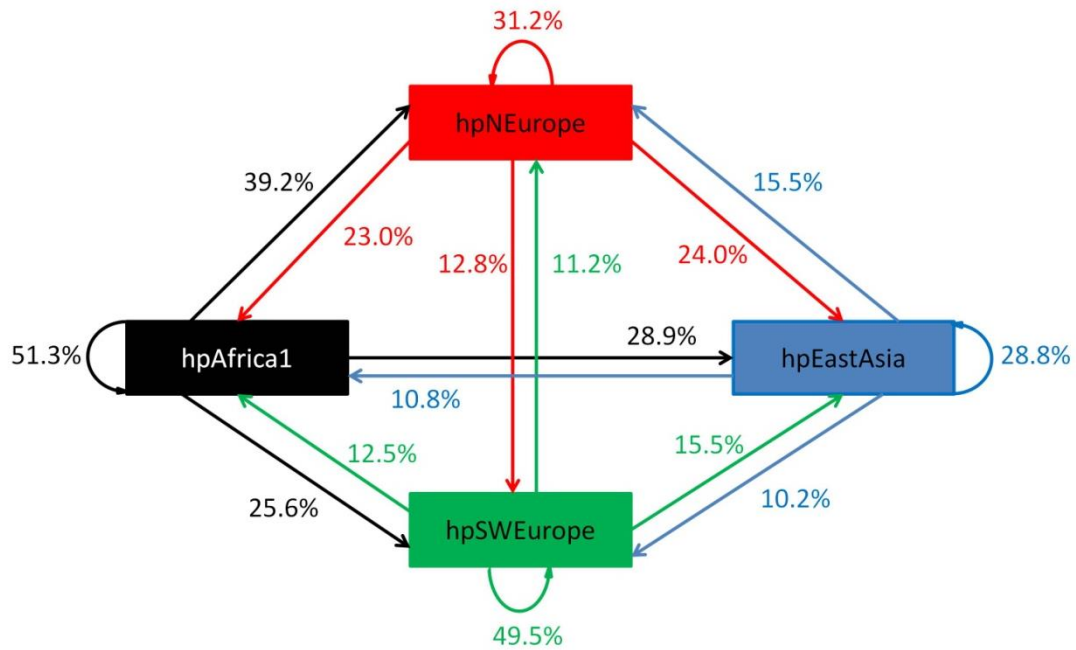

**Figure S3.** Genetic flux among phage populations. Exit arrows represents the average proportion of DNA chunks donated by a population to other population, i.e., entry arrows represent the average proportion of DNA chunks received from each population (for each genome the sum of all entry arrows is 100%; the percentages shown are averages for genomes from the same population and thus do not sum 100%, plus Hac phage is not considered).

## Bacterial recombination

There is a clear evidence of recombination among *H. pylori* genomes, especially among genomes from the same population, i.e., hpEastAsia, hpEurope or hpAfrica1 (black squares in figure 3). Moreover, there is finer observable clustering, hpAfrica1 presents two subgroups, hpEurope presents 4 subgroups and, interestingly hpEurope isolates from North Europe (UK and Sweden) cluster with hpEastAsia genomes, forming an additional subgroup. In the case of bacterial genomes *H. acynonichis* clearly form an outgroup, receiving DNA chunks from all populations in an undistinguished manner.

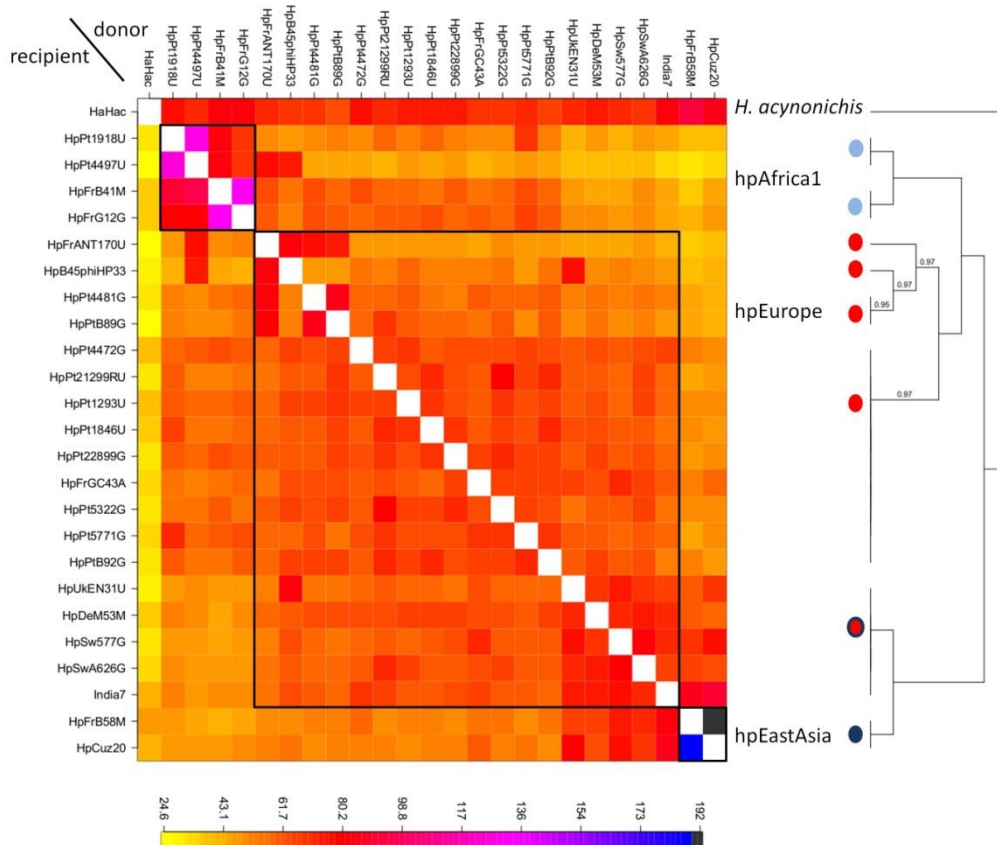

**Figure S4.** Co-ancestry matrix of *H. pylori* genomes that carry prophages. Each lane represents a *H. pylori* genome showed on the right. The color of each square of the matrix represents the expected number of chunks imported from a donor genome (column) to a recipient genome (row). These genomes are classified by MultiLocus Sequence Typing showed on the left together with a tree obtained from fineSTRUCTURE evidencing the subgroups of each population. The subgroups of each populations are evidenced by colored circles: hpEastAsia - dark blue, hpAfrica1 - light blue, hpEurope - red (hpEurope from northern Europe and India7, hpAsia2, clustered with hpEastAsia - red with blue delimiting circle).

## Prediction of activity of *H. pylori* prophages

**Table S1.** Prophage Hunter [2] prediction of prophage activity.

| Genome       | Similarity matching not incorporated |       | Similarity matching incorporated |       |
|--------------|--------------------------------------|-------|----------------------------------|-------|
|              | Category                             | Score | Category                         | Score |
| Hac          | Ambiguous                            | 0,52  | Ambiguous                        | 0,52  |
| Fr-B58-M     | Active                               | 0,84  | Ambiguous                        | 0,72  |
| Pt-B92-G     | Active                               | 0,83  | Ambiguous                        | 0,66  |
| Pt-212-99R-U | No matching records                  |       | Active                           | 0,93  |
| Pt-1293-U    | Active                               | 0,9   | Active                           | 0,89  |
| Pt-5771-G    | Ambiguous                            | 0,69  | Active                           | 0,98  |
| Pt-B89-G     | No prophage found                    |       | Active                           | 0,9   |
| Pt-5322-G    | No matching records                  |       | Ambiguous                        | 0,72  |
| Fr-ANT170-U  | No matching records                  |       | Active                           | 0,83  |
| Fr-MEG235-U  | Ambiguous                            | 0,61  | Ambiguous                        | 0,76  |
| Pt-1846-U    | Ambiguous                            | 0,59  | Active                           | 0,86  |
| Pt-228_99-G  | Ambiguous                            | 0,78  | Ambiguous                        | 0,74  |
| phiHP33      | No matching records                  |       | Active                           | 0,86  |
| Pt-4481-G    | Ambiguous                            | 0,58  | Ambiguous                        | 0,67  |
| UK-EN31-U    | Ambiguous                            | 0,71  | Ambiguous                        | 0,64  |
| UK-EN32-U    | Active                               | 0,88  | Ambiguous                        | 0,75  |
| De-M53-M     | Active                               | 0,94  | Active                           | 0,92  |
| India7       | Active                               | 0,9   | Ambiguous                        | 0,67  |
| Cuz20        | Active                               | 0,86  | Ambiguous                        | 0,72  |
| Sw-A626-G    | Active                               | 0,87  | Active                           | 0,82  |
| Sw-577-G     | Ambiguous                            | 0,69  | Active                           | 0,81  |
| Fr-G12-G     | Active                               | 0,93  | Active                           | 0,81  |
| Pt-4472-G    | Ambiguous                            | 0,79  | Ambiguous                        | 0,79  |
| Fr-GC43-A    | No matching records                  |       | Ambiguous                        | 0,63  |
| Pt-1918-U    | Active                               | 0,98  | Active                           | 0,98  |
| Pt-4497-U    | Ambiguous                            | 0,76  | Active                           | 0,93  |
| Fr-B41-M     | Ambiguous                            | 0,58  | Active                           | 0,89  |

Prophage Hunter results run over bacterial genome carrying the prophages. A score > 0.8 indicates an active prophage, between 0.5–0.8 ambiguous, and <0.5 inactive. Note: Prophage Hunter operates over whole-genome sequences of bacteria (phages KHP30, KHP40 and 1691P are not included).

## Reference *H. pylori* phage pangenome

**Table S2.** Clusters of orthologous genes.

|                  | #  | Annotation                                 | Number<br>of isolates<br>carrying<br>the gene | Reference pangenome |            |
|------------------|----|--------------------------------------------|-----------------------------------------------|---------------------|------------|
|                  |    |                                            |                                               | Phage               | Protein ID |
| Soft-core genome | 1  | <b>Integrase</b>                           | 29                                            | 1961P               | AFC61901.1 |
|                  | 2  | <b>Portal protein</b>                      | 28                                            | 1961P               | AFC61919.1 |
|                  | 3  | <b>Structural protein</b>                  | 28                                            | 1961P               | AFC61916.1 |
|                  | 4  | <b>Hypothetical protein/DNA associated</b> | 28                                            | 1961P               | AFC61904.1 |
|                  | 5  | <b>DNA helicase</b>                        | 28                                            | 1961P               | AFC61907.1 |
|                  | 6  | <b>Hypothetical protein #1</b>             | 28                                            | 1961P               | AFC61927.1 |
|                  | 7  | <b>Terminase</b>                           | 28                                            | 1961P               | AFC61920.1 |
|                  | 8  | <b>Hypothetical protein #2</b>             | 27                                            | Cuz20               | ADO03377.1 |
|                  | 9  | <b>Holin</b>                               | 27                                            | 1961P               | AFC61923.1 |
|                  | 10 | <b>Hypothetical protein #3</b>             | 27                                            | 1961P               | AFC61926.1 |
|                  | 11 | Hypothetical protein                       | 26                                            | 1961P               | AFC61930.1 |
|                  | 12 | Hypothetical protein                       | 25                                            | 1961P               | AFC61921.1 |
|                  | 13 | Hypothetical protein                       | 25                                            | 1961P               | AFC61925.1 |
|                  | 14 | Putative chromosome segregation protein    | 25                                            | 1961P               | AFC61909.1 |
|                  | 15 | Structure protein                          | 24                                            | 1961P               | AFC61918.1 |
|                  | 16 | Structure protein                          | 24                                            | 1961P               | AFC61929.1 |
|                  | 17 | Structure protein                          | 23                                            | 1961P               | AFC61915.1 |
|                  | 18 | Hypothetical protein                       | 23                                            | DeM53M              | ANT43224.1 |
|                  | 19 | Hypothetical protein                       | 23                                            | 1961P               | AFC61925.1 |
|                  | 20 | JHP1044-like mosaic region protein         | 22                                            | 1961P               | AFC61910.1 |
|                  | 21 | Hypothetical protein                       | 22                                            | Cuz20               | ADO03395.1 |
|                  | 22 | Structure protein                          | 22                                            | 1961P               | AFC61931.1 |
|                  | 23 | Hypothetical protein                       | 22                                            | Cuz20               | ADO03391.1 |
|                  | 24 | Hypothetical protein                       | 21                                            | Cuz20               | ADO03403.1 |
|                  | 25 | Hypothetical protein                       | 21                                            | 1961P               | AFC61913.1 |
|                  | 26 | DNA primase                                | 20                                            | Cuz20               | ADO03398.1 |
|                  | 27 | Hypothetical protein/DNA associated        | 20                                            | 1961P               | AFC61904.1 |
|                  | 28 | Hypothetical protein                       | 17                                            | Cuz20               | ADO03375.1 |
|                  | 29 | Putative tail fiber protein                | 12                                            | FrB41M              | ANT42641.1 |
|                  | 30 | Hypothetical protein                       | 11                                            | 1961P               | AFC61906.1 |
|                  | 31 | Terminase small subunit                    | 11                                            | 1961P               | AFC61932.1 |
|                  | 32 | Tail fiber protein                         | 11                                            | FrB41M              | ANT42640.1 |
|                  | 33 | Putative tail assembly protein             | 11                                            | FrB41M              | ANT42642.1 |
|                  | 34 | Hypothetical protein                       | 10                                            | DeM53M              | ANT43203.1 |
|                  | 35 | DNA primase                                | 9                                             | 1961P               | AFC61908.1 |
|                  | 36 | Hypothetical protein                       | 9                                             | DeM53M              | ANT43209.1 |
|                  | 37 | Hypothetical protein                       | 7                                             | FrB41M              | ANT42639.1 |
|                  | 38 | Coiled-coil domain-containing protein      | 7                                             | FrB41M              | ANT42662.1 |

|    |                                        |   |           |            |
|----|----------------------------------------|---|-----------|------------|
| 39 | Hypothetical protein                   | 6 | FrB41M    | ANT42634.1 |
| 40 | Hypothetical protein                   | 5 | DeM53M    | *          |
| 41 | Hypothetical protein                   | 5 | FrB41M    | ANT42644.1 |
| 42 | Coiled-coil domain-containing protein  | 5 | FrB41M    | ANT42646.1 |
| 43 | Hypothetical protein                   | 5 | FrB41M    | ANT42648.1 |
| 44 | Hypothetical protein                   | 5 | India7    | ADU80393.1 |
| 45 | Hypothetical protein                   | 5 | phiHP33   | AET85155.1 |
| 46 | Hypothetical protein                   | 5 | FrB41M    | **         |
| 47 | Hypothetical protein                   | 5 | FrB41M    | ANT42649.1 |
| 48 | Hypothetical protein                   | 4 | FrB41M    | ANT42638.1 |
| 49 | Hypothetical protein                   | 4 | FrB41M    | ANT42659.1 |
| 50 | Mobile element protein (tnpb)          | 4 | FrGC43A   | ANT42862.1 |
| 51 | IS605 transposase (tnpa)               | 4 | FrGC43A   | ANT42863.1 |
| 52 | Ishp608 transposase (orfb)             | 4 | FrANT170U | ANT43079.1 |
| 53 | Mobile element protein (orfa)          | 4 | FrANT170U | ANT43080.1 |
| 54 | Hypothetical protein                   | 3 | FrB41M    | ANT42660.1 |
| 55 | Hypothetical protein                   | 3 | KHP40     | ***        |
| 56 | IS607 Mobile element protein (tnpb)    | 2 | FrB58M    | ANT42794.1 |
| 57 | Hypothetical protein                   | 2 | FrANT170U | ANT43066.1 |
| 58 | First ORF in transposon ISC1904 (tnpa) | 2 | FrB58M    | ANT42793.1 |
| 59 | Hypothetical protein                   | 2 | UKEN31U   | ANT42487.1 |
| 60 | Structure protein                      | 1 | 1961P     | AFC61917.1 |
| 61 | Hypothetical protein                   | 1 | 1961P     | AFC61922.1 |
| 62 | Putative Hac prophage II protein       | 1 | Cuz20     | ADO03406.1 |
| 63 | Hypothetical protein                   | 1 | Cuz20     | ADO03385.1 |
| 64 | Nitrogen-activated protein kinase 1    | 1 | FrB41M    | ANT42661.1 |
| 65 | Hypothetical protein                   | 1 | FrB58M    | ANT42802.1 |
| 66 | Hypothetical protein                   | 1 | FrG12G    | ANT42822.1 |
| 67 | Hypothetical protein                   | 1 | FrGC43A   | ANT42857.1 |
| 68 | Hypothetical protein                   | 1 | FrGC43A   | ANT42859.1 |
| 69 | Hypothetical protein                   | 1 | FrGC43A   | ANT42886.1 |
| 70 | Putative Hac prophage II protein       | 1 | India7    | ADU80392.1 |
| 71 | Hypothetical protein                   | 1 | India7    | ADU80415.1 |
| 72 | Hypothetical protein                   | 1 | KHP40     | ****       |
| 73 | Hypothetical protein                   | 1 | Pt1293U   | ANT43103.1 |
| 74 | Hypothetical protein                   | 1 | Pt22899G  | ANT42522.1 |
| 75 | Hypothetical protein                   | 1 | PtB92G    | ANT42925.1 |

Singletons

Newly detected by Prokka annotation:

\*ATGATTA AAAAGCCTCACCTTGACCATACACAAGCCCTTTGTCTTATGTGTCAGGGTCTCTGGCACACTTAAAAAGTGTTTTATGGGTTAGA  
AATATTCTCTAACCCATTGATTGAT

\*\*ATGAGACAGCATGGAATAAATCCAACGATCCTATAGAAGAACTCTAAGAACTACAAGAAAGAAGCTGATGCTAAGAGAAAGCAGTTACAA  
AAAGCTAAAAAGGATGAAAAGAAAAAGGCGTTATACATTTGCAAGAGTAGTCCGTTTAGCTATTTTAGAGGGTATTAGGAAGTTTCAAAAAGAA  
AACCTATTTTGAACCTGCAAAATGCAAAATTTTGAGCTCGCAATAAGCATTTTAGAACAAAAACAAAAGAGCCAGAAATAAGGGAAAAAATG  
CAGAATTTGATAATGAATAG

\*\*\*ATGGCGAAAATACCCAAGCGCGCAGAATTTGGATTATTGAAAATGAAGTTTTAGAAATGTTAGCGATTAGCGTTTTGATTTTCATTTTAGGG  
ATTAGCTTTATTTTAGCGGTTATTTTTCTGTAGAGGCGTTATGCTATGGATAA

\*\*\*\*ATGCGGGTTTTGTTAACCCATTTTTGGGATTTGTTGGGTTTTTGTGTTGTTATTAGATTATTTCTATATATTTCAAAAAACAAAACAATA  
ACCCCGATAAAGAGCTAAATCAAAAAAAGCGGTTACTATAAAAGCCCTACAATAG



## References

1. Page AJ, Cummins CA, Hunt M, Wong VK, Reuter S, Holden MT, Fookes M, Falush D, Keane JA, Parkhill J. Roary: rapid large-scale prokaryote pan genome analysis. *Bioinformatics* 2015;31:3691-3693.
2. Song W, Sun HX, Zhang C, Cheng L, Peng Y, Deng Z, Wang D, Wang Y, Hu M, Liu W, Yang H, Shen Y, Li J, You L, Xiao M. Prophage Hunter: an integrative hunting tool for active prophages. *Nucleic Acids Res* 2019; pii: gkz380.
